# Supplementary material for: Regulated Deficit Irrigation during Vegetative Growth Enhances Crop Water Productivity in Chickpea (Cicer arietinum L.)
Source: MDPI journal article supplement (doi:10.3390/agronomy13030917), 2023-03-20
Supplement: s1 [file s1]

# SUPPLEMENTARY MATERIALS FOR: Regulated deficit irrigation during vegetative growth enhances crop water productivity in chickpea (*Cicer arietinum* L.)

J. Denis Osuna-Amador, Rodrigo Méndez-Alonzo, Armando Trasviña Castro, Romeo Saldívar Lucio, Rufina Hernández Martínez, Georgianne W. Moore.

**Table S1.** Analysis of variance of eight productivity, yield, quality, and growth variables of chickpeas across deficit irrigation treatments during two consecutive years of experiments (2020 and 2021) in Todos Santos, Baja California Sur, Mexico.

| Source of variation | DF | Grain yield and quality       |                            | Plant growth               |                            |                          |                           | Productivity               |                          |
|---------------------|----|-------------------------------|----------------------------|----------------------------|----------------------------|--------------------------|---------------------------|----------------------------|--------------------------|
|                     |    | GY                            | Cal                        | H                          | PDW                        | PP                       | GP                        | HI                         | CWP                      |
| Y                   | 1  | 109951.92 <sup>ns</sup>       | <b>182.31<sup>**</sup></b> | <b>0.0961<sup>**</sup></b> | <b>195.79<sup>**</sup></b> | 3.95 <sup>ns</sup>       | 2.72 <sup>ns</sup>        | <b>0.0663<sup>**</sup></b> | <b>0.89<sup>**</sup></b> |
| B (Y)               | 6  | 85214.48 <sup>ns</sup>        | 11.19 <sup>ns</sup>        | 0.0005 <sup>ns</sup>       | 17.68 <sup>**</sup>        | 6.53 <sup>**</sup>       | 10.40 <sup>**</sup>       | 0.0035 <sup>ns</sup>       | 0.07 <sup>*</sup>        |
| T                   | 7  | <b>202004.16<sup>**</sup></b> | <b>37.30<sup>**</sup></b>  | <b>0.0028<sup>**</sup></b> | <b>17.65<sup>**</sup></b>  | <b>9.27<sup>**</sup></b> | <b>15.74<sup>**</sup></b> | <b>0.0086<sup>**</sup></b> | <b>0.10<sup>**</sup></b> |
| Y*T                 | 7  | 29914.49 <sup>ns</sup>        | 12.06 <sup>ns</sup>        | <b>0.0016<sup>**</sup></b> | 3.96 <sup>ns</sup>         | 2.49 <sup>ns</sup>       | 4.48 <sup>ns</sup>        | 0.0033 <sup>ns</sup>       | 0.03 <sup>ns</sup>       |
| Error               | 42 | 38453.76                      | 11.45                      | 0.0004                     | 3.80                       | 1.53                     | 2.75                      | 0.0019                     | 0.03                     |
| Media               |    | 903.33                        | 47.79                      | 0.40                       | 13.18                      | 7.96                     | 9.18                      | 0.44                       | 0.78                     |
| CV (%)              |    | 21.70                         | 7.08                       | 5.21                       | 14.79                      | 15.53                    | 18.07                     | 9.84                       | 22.44                    |

GY= grain yield, Cal= grain caliber, H= plant height, PDW = plant dry weight, PP = pods per plant, GP= grain per plant, HI= harvest index, CWP= crop water productivity. Y= year, B= block, T= treatments. DF=Degrees of freedom. CV= coefficient of variation. <sup>ns</sup>= non significant (  $p \geq 0.05$ ), Bold with \* =  $p < 0.05$ , \*\* =  $p < 0.01$ . Values in each column inside every variable represent mean squared error.

**Table S2.** Differences in grain yield and quality, plant growth and crop water productivity of chickpeas between two consecutive years of deficit irrigation experiments (2020, 2021) in Todos Santos, Baja California Sur, Mexico.

| Year | Grain yield and quality* |             | Plant growth* |             |            |            | Productivity* |             |
|------|--------------------------|-------------|---------------|-------------|------------|------------|---------------|-------------|
|      | GY                       | Cal         | H             | PDW         | PP         | GP         | HI            | CWP         |
| 2020 | 861.8 ± 260.7a           | 49.4 ± 4.4a | 0.44 ± 0.03a  | 11.4 ± 2.8b | 7.7 ± 2.0a | 8.9 ± 2.6a | 0.47 ± 0.06a  | 0.90 ± 0.2a |
| 2021 | 944.7 ± 230.1a           | 46.1 ± 3.0b | 0.37 ± 0.02b  | 14.9 ± 2.3a | 8.2 ± 1.4a | 9.3 ± 1.7a | 0.41 ± 0.03b  | 0.66 ± 0.1b |

GY= grain yield, Cal= grain caliber, H= plant height, PDW= plant dry weight, PP= pods per plant, GP= grain per plant, HI= harvest index, CWP= crop water productivity. Y= year, B= block, T= treatments.  
 \*Mean ± SD. <sup>ab</sup> Different letter between years, in the same column, indicates statistically significant ( $p \leq 0.05$ , LSD).
